# Supplementary material for: Occurrences and changes in bacterial growth-promoting nutrients in drinking water from source to tap: a review
Source: Royal Society of Chemistry journal article supplement (doi:10.1039/d1ew00514f), 2021-01-01
Supplement: d1ew00514f1.pdf [file d1ew00514f1.pdf]

1 Table S1. Nutrient concentrations in raw and treated water

| Types               | Concentrations ( $\mu\text{g L}^{-1}$ ) |         | Removal rates (%) |         |         | References                                                                                        |
|---------------------|-----------------------------------------|---------|-------------------|---------|---------|---------------------------------------------------------------------------------------------------|
|                     | Raw                                     | Treated | Minimum           | Maximum | Average |                                                                                                   |
| BDOC                | 144–2,000                               | 93–540  | 32                | 90      | 54      | Block et al., 1992; Vasyukova et al., 2013; Zhang et al., 2016; So et al., 2017; Son et al., 2019 |
| AOC <sub>P17</sub>  | 28–143                                  | 20–110  | -15               | 79      | 45      | Lou et al., 2009; 2012; Ohkouchi et al., 2011; Choi et al., 2019                                  |
| AOC <sub>NOX</sub>  | 4–12                                    | 10–25   | -289              | 16      | -130    | Lou et al., 2009; 2012; Ohkouchi et al., 2011; Choi et al., 2019                                  |
| AOC <sub>ewag</sub> | 56–395                                  | 17–121  | 13                | 81      | 49      | Hammes et al., 2006; Vital et al., 2010; Park et al., 2016; 2020                                  |
| AOC <sub>A3</sub>   | 84–200                                  | 5–15    | 92                | 94      | 93      | Hijnen et al., 2018                                                                               |

2

3

4

5 Table S2. Comparison of AOC P17 and AOC NOX removals through treatment train.

| Removal (%)     | Lou et al., 2009 | Lou et al., 2012<br>(DWTP C) | Lou et al., 2012<br>(DWTP G) | Ohkouchi et al.,<br>2011 (Winter) | Ohkouchi et al.,<br>2011 (Summer) | Choi et al., 2019 | average |
|-----------------|------------------|------------------------------|------------------------------|-----------------------------------|-----------------------------------|-------------------|---------|
| AOC P17         |                  |                              |                              |                                   |                                   |                   |         |
| Preoxidation    | n.a.             | 31%                          | 16%                          | n.a.                              | n.a.                              | -50%              | -1%     |
| Sedimentation   | 37%              | 36%                          | 48%                          | 61%                               | 50%                               | 27%               | 43%     |
| Sand filtration | 13%              | 23%                          | 7%                           | -60%                              | -14%                              | 40%               | 2%      |
| Ozonation       | 10%              | -9%                          | n.a.                         | 5%                                | -100%                             | -12%              | -21%    |
| BAC             | 60%              | 20%                          | n.a.                         | -37%                              | 56%                               | 52%               | 30%     |
| Finished        | -8%              | -12%                         | -10%                         | 5%                                | -151%                             | -5%               | -30%    |
| AOC NOX         |                  |                              |                              |                                   |                                   |                   |         |
| Preoxidation    | n.a.             | -211%                        | -183%                        | n.a.                              | n.a.                              | -95%              | -163%   |
| Sedimentation   | 19%              | 36%                          | 20%                          | -103%                             | -23%                              | 2%                | -8%     |
| Sand filtration | 16%              | 7%                           | -3%                          | -77%                              | -69%                              | 17%               | -18%    |
| Ozonation       | -280%            | -26%                         | n.a.                         | -32%                              | -147%                             | -290%             | -155%   |
| BAC             | 81%              | 26%                          | n.a.                         | 51%                               | 63%                               | 78%               | 60%     |
| Finished        | -72%             | -73%                         | 10%                          | -215%                             | -72%                              | -19%              | -73%    |

6

7

8 Table S3. Previous studies on biodegradable organic matter characterization and fractionations.

| Parameters              | References                                                                                                                                                                                                                                  |
|-------------------------|---------------------------------------------------------------------------------------------------------------------------------------------------------------------------------------------------------------------------------------------|
| AOC <sub>NOX, P17</sub> | Hem and Efraimsen, 2001; Chien <i>et al.</i> , 2008; Labanowski and Feuillade, 2009; Ohkouchi <i>et al.</i> , 2011; Lou <i>et al.</i> , 2012; Elhadidy <i>et al.</i> , 2016; van der Kooij <i>et al.</i> , 2015; Tang <i>et al.</i> , 2018; |
| AOC <sub>A3</sub>       | Sack <i>et al.</i> , 2011; 2014; Hijnen <i>et al.</i> , 2018; Schurer <i>et al.</i> , 2019                                                                                                                                                  |
| AOC <sub>eawag</sub>    | Hammes <i>et al.</i> , 2006; Ross <i>et al.</i> , 2013; Elhadidy <i>et al.</i> , 2016; Park <i>et al.</i> , 2016; Kim <i>et al.</i> , 2017                                                                                                  |
| BDOC                    | Volk <i>et al.</i> , 1997; Labanowski and Feuillade, 2009; So <i>et al.</i> , 2017; Son <i>et al.</i> , 2019; Sambo <i>et al.</i> , 2020                                                                                                    |

9

10

11 Table S4. Literature on engineered and environmental factors for nutrient control.

| Processes                | Factors            | References                                                                                                                                                                                                                                                         |
|--------------------------|--------------------|--------------------------------------------------------------------------------------------------------------------------------------------------------------------------------------------------------------------------------------------------------------------|
| Source water             | Source type        | van der Kooij <i>et al.</i> , 1982; Miettinen <i>et al.</i> , 1999; Lehtola <i>et al.</i> , 2002; Volk and LeChevallier, 2002; van der Wielen and van der Kooij, 2010; van der Wielen and van der Kooij, 2013; Nescerecka <i>et al.</i> , 2018                     |
|                          | Seasonal variation | Hu <i>et al.</i> , 1999; Escobar and Randall, 2001; Escobar <i>et al.</i> , 2002; Ohkouchi <i>et al.</i> , 2011; Lohwacharin <i>et al.</i> , 2014; Pharand <i>et al.</i> , 2015; Elhadidy <i>et al.</i> , 2016; So <i>et al.</i> , 2017; Choi <i>et al.</i> , 2019 |
|                          | Protection program | LeChevallier <i>et al.</i> , 1996; Volk and LeChevallier, 2002                                                                                                                                                                                                     |
|                          | Algal bloom        | *Okuda <i>et al.</i> , 2009; *Ramseier <i>et al.</i> , 2011; *Sun <i>et al.</i> , 2016; Choi <i>et al.</i> , 2019                                                                                                                                                  |
| Managed aquifer recharge | Preoxidation       | *Kim <i>et al.</i> , 2017; *Kim <i>et al.</i> , 2019; *Noh <i>et al.</i> , 2020a                                                                                                                                                                                   |
|                          | Storage time       | *Kim <i>et al.</i> , 2019                                                                                                                                                                                                                                          |
| Preoxidation             | Chlorine           | Lou <i>et al.</i> , 2012; Lu <i>et al.</i> , 2014; Park <i>et al.</i> , 2016; Choi <i>et al.</i> , 2019                                                                                                                                                            |
|                          | Ozone              | Hammes <i>et al.</i> , 2006; *Chen <i>et al.</i> , 2007; Chien <i>et al.</i> , 2007; Chien <i>et al.</i> , 2008; Vital <i>et al.</i> , 2010; Yang <i>et al.</i> , 2011; Lou <i>et al.</i> , 2012; Zhang <i>et al.</i> , 2016; Liao <i>et al.</i> , 2018            |
|                          | Permanganate       | *Chen <i>et al.</i> , 2007; *Ramseier <i>et al.</i> , 2011                                                                                                                                                                                                         |

|                                                |                                     |                                                                                                                                                                                |
|------------------------------------------------|-------------------------------------|--------------------------------------------------------------------------------------------------------------------------------------------------------------------------------|
| Coagulation,<br>sedimentation                  | Coagulant type, dose                | Lehtola <i>et al.</i> , 2002; Volk and LeChevallier, 2002; *Bazri and Mohseni, 2016; *Pramanik <i>et al.</i> , 2017; *Yang <i>et al.</i> , 2020                                |
|                                                | Seasonal variation                  | Ohkouchi <i>et al.</i> , 2011; So <i>et al.</i> , 2017; Choi <i>et al.</i> , 2019                                                                                              |
| Membrane<br>filtration                         | Microfiltration,<br>ultrafiltration | *Yu <i>et al.</i> , 2011; *Schurer <i>et al.</i> , 2019; Park <i>et al.</i> , 2020                                                                                             |
|                                                | Nanofiltration,<br>reverse osmosis  | Escobar and Randall, 2001; *Escobar <i>et al.</i> , 2002; *Liikanen <i>et al.</i> , 2003; Hong <i>et al.</i> , 2005; *Park <i>et al.</i> , 2005; *Meylan <i>et al.</i> , 2007; |
|                                                | Gravity-driven membrane             | *Derlon <i>et al.</i> , 2014; *Chomiak <i>et al.</i> , 2015                                                                                                                    |
|                                                | Polymer materials                   | Liikanen <i>et al.</i> , 2003                                                                                                                                                  |
| Rapid sand<br>filtration,                      | Seasonal variation                  | Ohkouchi <i>et al.</i> , 2011; Yang <i>et al.</i> , 2011; Pharand <i>et al.</i> , 2015; So <i>et al.</i> , 2017                                                                |
|                                                | EBCT                                | *Wert <i>et al.</i> , 2008; Pharand <i>et al.</i> , 2015; *Ross <i>et al.</i> , 2019                                                                                           |
| Biologically<br>activated carbon<br>filtration | Biomass maturation                  | *Velten <i>et al.</i> , 2011; *Ross <i>et al.</i> , 2019                                                                                                                       |
|                                                | Media type, layer                   | Chien <i>et al.</i> , 2007; Chien <i>et al.</i> , 2008; *Wert <i>et al.</i> , 2008;; Yang <i>et al.</i> , 2011; *Liu <i>et al.</i> , 2019                                      |
|                                                | Backwashing                         | Bassett <i>et al.</i> , 2018                                                                                                                                                   |
|                                                | Oxidant addition                    | *de Vera <i>et al.</i> , 2019; *Noh <i>et al.</i> , 2020b                                                                                                                      |
|                                                | Nutrient supplement                 | Bassett <i>et al.</i> , 2018; *Xing <i>et al.</i> , 2018; *Ross <i>et al.</i> , 2019; *Noh <i>et al.</i> , 2020b                                                               |

|                                                      |                       |                                                                                                                                                                                                                                                                                       |
|------------------------------------------------------|-----------------------|---------------------------------------------------------------------------------------------------------------------------------------------------------------------------------------------------------------------------------------------------------------------------------------|
| Disinfection                                         | Chlorine              | Zhang and DiGiano, 2002; Chien <i>et al.</i> , 2007; Ohkouchi <i>et al.</i> , 2011; Park <i>et al.</i> , 2016; Zhang <i>et al.</i> , 2016; So <i>et al.</i> , 2017; Nescerecka <i>et al.</i> , 2018; *Li <i>et al.</i> , 2018; *Huang <i>et al.</i> , 2020; Park <i>et al.</i> , 2020 |
|                                                      | Chloramine            | Zhang and DiGiano, 2002; Lu <i>et al.</i> , 2014; *Li <i>et al.</i> , 2018; *Chen <i>et al.</i> , 2020                                                                                                                                                                                |
|                                                      | Chlorine dioxide      | *Chen <i>et al.</i> , 2020                                                                                                                                                                                                                                                            |
|                                                      | UV                    | *Shaw <i>et al.</i> , 2000; Lehtola <i>et al.</i> , 2003; *Choi and Choi, 2010; *Metz <i>et al.</i> , 2011; *Huang <i>et al.</i> , 2020                                                                                                                                               |
|                                                      | Seasonal variation    | Liu <i>et al.</i> , 2002; *Choi and Choi, 2010; Ohkouchi <i>et al.</i> , 2011; So <i>et al.</i> , 2017; Nescerecka <i>et al.</i> , 2018                                                                                                                                               |
| Main distribution<br>and building<br>plumbing system | Seasonal variation    | Liu <i>et al.</i> , 2002; Polanska <i>et al.</i> , 2005a; Ohkouchi <i>et al.</i> , 2011; Prest <i>et al.</i> , 2016b; Zhang <i>et al.</i> , 2016; So <i>et al.</i> , 2017; Li <i>et al.</i> , 2018; Nescerecka <i>et al.</i> , 2018; Pick <i>et al.</i> , 2019                        |
|                                                      | Building stagnation   | Lautenschlager <i>et al.</i> , 2010; Chen <i>et al.</i> , 2013; Inkinen <i>et al.</i> , 2014                                                                                                                                                                                          |
|                                                      | Residual disinfectant | Ohkouchi <i>et al.</i> , 2013; Lu <i>et al.</i> , 2014                                                                                                                                                                                                                                |
|                                                      | Water age             | Zhang and DiGiano, 2002; Polanska <i>et al.</i> , 2005a; van der Kooij <i>et al.</i> , 2015; Prest <i>et al.</i> , 2016b; Li <i>et al.</i> , 2018; Pick <i>et al.</i> , 2019; Park <i>et al.</i> , 2020                                                                               |
| Pipe materials                                       | Material type         | *Bucheli-Witschel <i>et al.</i> , 2012; Inkinen <i>et al.</i> , 2014; *Wen <i>et al.</i> , 2015; *Connell <i>et al.</i> , 2016;                                                                                                                                                       |

---

\*Proctor *et al.*, 2016; \*Mao *et al.*, 2018; \*Park *et al.*, 2019

---

12

\*lab- or pilot-scale studies only

13

14 Table S5. References for AOC removal data from the full-scale water treatment systems.

| Processes                     | AOC ( $\mu\text{g L}^{-1}$ ) |      |      | Removal (%) |      |      | References                                                                                                                                                                                                                                                                                                                                                                                                                                                                                                                                                                      |
|-------------------------------|------------------------------|------|------|-------------|------|------|---------------------------------------------------------------------------------------------------------------------------------------------------------------------------------------------------------------------------------------------------------------------------------------------------------------------------------------------------------------------------------------------------------------------------------------------------------------------------------------------------------------------------------------------------------------------------------|
|                               | Min.                         | Max. | Avg. | Min.        | Max. | Avg. |                                                                                                                                                                                                                                                                                                                                                                                                                                                                                                                                                                                 |
| Prechlorination               | 97                           | 100  | 99   | -59         | -6   | -38  | Lou <i>et al.</i> , 2012; Park <i>et al.</i> , 2016; Choi <i>et al.</i> , 2019 (n=3)                                                                                                                                                                                                                                                                                                                                                                                                                                                                                            |
| Preozonation                  | 129                          | 520  | 249  | -166        | 19   | -74  | Hammes <i>et al.</i> , 2006; Chien <i>et al.</i> , 2008; Vital <i>et al.</i> , 2010 (DWTP A and B);<br>Yang <i>et al.</i> , 2011; Lou <i>et al.</i> , 2012; Zhang <i>et al.</i> , 2016; Liao <i>et al.</i> , 2018 (n=8)                                                                                                                                                                                                                                                                                                                                                         |
| Coagulation,<br>sedimentation | 18                           | 149  | 84   | 12          | 67   | 36   | Lehtola <i>et al.</i> , 2002; Chien <i>et al.</i> , 2008; Lou <i>et al.</i> , 2009; Lou <i>et al.</i> , 2012;<br>Ohkouchi <i>et al.</i> , 2011 (Summer and Winter); Vasyukova <i>et al.</i> , 2013; Lu <i>et al.</i> ,<br>2014; Park <i>et al.</i> , 2016; Zhang <i>et al.</i> , 2016; Liao <i>et al.</i> , 2018; Choi <i>et al.</i> ,<br>2019; Park <i>et al.</i> , 2020; Yang <i>et al.</i> , 2020 (n=14)                                                                                                                                                                     |
| Rapid sand<br>filtration      | 28                           | 135  | 64   | -27         | 87   | 38   | Hammes <i>et al.</i> , 2006; Chien <i>et al.</i> , 2008; Lou <i>et al.</i> , 2009; Vital <i>et al.</i> , 2010<br>(DWTP A and B); Ohkouchi <i>et al.</i> , 2011 (Summer and Winter); Vasyukova<br><i>et al.</i> , 2013; Lu <i>et al.</i> , 2014; Pharand <i>et al.</i> , 2015 (Summer and Winter);<br>Elhadidy <i>et al.</i> , 2016 (two sampling periods, using $\text{AOC}_{\text{P17,NOX}}$ and $\text{AOC}_{\text{Eawag}}$<br>methods simultaneously); Zhang <i>et al.</i> , 2016; Liao <i>et al.</i> , 2018; Choi <i>et al.</i> ,<br>2019; Park <i>et al.</i> , 2020 (n=19) |



|                             |    |     |     |      |     |      |                                                                                                                                                                                                                                                                                                                                                                                                                                                                                                                                                                                                 |
|-----------------------------|----|-----|-----|------|-----|------|-------------------------------------------------------------------------------------------------------------------------------------------------------------------------------------------------------------------------------------------------------------------------------------------------------------------------------------------------------------------------------------------------------------------------------------------------------------------------------------------------------------------------------------------------------------------------------------------------|
| (Intermediate)<br>Ozonation | 45 | 416 | 153 | -362 | 2   | -101 | Lehtola <i>et al.</i> , 2002; Chien <i>et al.</i> , 2008; Lou <i>et al.</i> , 2009; Vital <i>et al.</i> , 2010 (DWTP B); Ohkouchi <i>et al.</i> , 2011 (two ozonation steps, Summer and Winter); Yang <i>et al.</i> , 2011; Vasyukova <i>et al.</i> , 2013; Lu <i>et al.</i> , 2014; Zhang <i>et al.</i> , 2016; Park <i>et al.</i> , 2016; Elhadidy <i>et al.</i> , 2016 (2 sampling periods, using AOC <sub>P17,NOX</sub> and AOC <sub>Eawag</sub> methods simultaneously); Liao <i>et al.</i> , 2018; Choi <i>et al.</i> , 2019; Park <i>et al.</i> , 2020; Yang <i>et al.</i> , 2020 (n=22) |
| BAC filtration              | 2  | 154 | 53  | -16  | 83  | 52   | Lehtola <i>et al.</i> , 2002; Chien <i>et al.</i> , 2008; Lou <i>et al.</i> , 2009; Vital <i>et al.</i> , 2010 (DWTP B); Ohkouchi <i>et al.</i> , 2011 (Summer and Winter); Yang <i>et al.</i> , 2011; Vasyukova <i>et al.</i> , 2013; Lu <i>et al.</i> , 2014; Park <i>et al.</i> , 2016; Zhang <i>et al.</i> , 2016; Liao <i>et al.</i> , 2018; Choi <i>et al.</i> , 2019; Park <i>et al.</i> , 2020; Yang <i>et al.</i> , 2020 (n=15)                                                                                                                                                        |
| Disinfection                | 16 | 135 | 64  | -107 | -11 | -41  | Lehtola <i>et al.</i> , 2002; Chien <i>et al.</i> , 2008; Lou <i>et al.</i> , 2009; Vital <i>et al.</i> , 2010; Ohkouchi <i>et al.</i> , 2011 (Summer and Winter); Yang <i>et al.</i> , 2011; Lu <i>et al.</i> , 2014; Zhang <i>et al.</i> , 2016; Choi <i>et al.</i> , 2019; Park <i>et al.</i> , 2020 (n=11)                                                                                                                                                                                                                                                                                  |

16 Table S6. Comparison of assimilable organic carbon (AOC) migration potentials from the polymeric materials in contact with drinking water.

| Materials                                     |                       | Common usage                          | Sum of AOC migration<br>( $\mu\text{g cm}^{-2}$ ) | S/V ratio ( $\text{cm}^{-1}$ ) | References                            |
|-----------------------------------------------|-----------------------|---------------------------------------|---------------------------------------------------|--------------------------------|---------------------------------------|
| Acrylonitrile<br>butadiene styrene<br>(ABS)   |                       | Pipe, fitting,<br>water tank, housing | 0.43–0.92                                         | 1.0                            | Park <i>et al.</i> , 2019             |
|                                               |                       |                                       | 0.19                                              | 2.0                            | Bucheli-Witschel <i>et al.</i> , 2012 |
| Ethylene propylene<br>diene monomer<br>(EPDM) | 2% plasticized        | Shower hose,                          | 0.68                                              | 1.0                            | Wen <i>et al.</i> , 2015              |
|                                               |                       | fitting, sealing,                     | 0.48                                              | 1.0                            | Mao <i>et al.</i> , 2016              |
|                                               | 20% plasticized       | membranes                             | 0.00                                              | 2.0                            | Bucheli-Witschel <i>et al.</i> , 2012 |
|                                               |                       |                                       | 0.00                                              | 1.0                            | Wen <i>et al.</i> , 2015              |
|                                               | n.a.                  |                                       | 0.15–0.20                                         | 1.0                            | Park <i>et al.</i> , 2019             |
| Polybutylene (PB)                             |                       | Pipe, fitting, tubing                 | 0.14                                              | 2.0                            | Bucheli-Witschel <i>et al.</i> , 2012 |
|                                               |                       |                                       | 0.36                                              | 1.0                            | Mao <i>et al.</i> , 2016              |
| Polyethylene (PE)                             |                       | Pipe, fitting, tubing,<br>water tank  | 0.26–0.42                                         | 1.0                            | Park <i>et al.</i> , 2019             |
| Cross-linked                                  | PEXa (peroxide cross- | Pipe,                                 | 0.19                                              | 1.0                            | Wen <i>et al.</i> , 2015              |

|                          |                                   |              |           |                              |                                       |
|--------------------------|-----------------------------------|--------------|-----------|------------------------------|---------------------------------------|
|                          | linked)                           |              | 0.12      | 1.9–2.4                      | Connell <i>et al.</i> , 2016          |
|                          |                                   |              | 0.27      | 2.0                          | Bucheli-Witschel <i>et al.</i> , 2012 |
|                          | PEXb (silane cross-linked)        |              | 0.05–0.18 | 1.9–2.4                      | Connell <i>et al.</i> , 2016          |
| polyethylene (PEX)       |                                   | shower hose, | 0.41      | 1.0                          | Mao <i>et al.</i> , 2016              |
|                          |                                   | tubing       | 0.06      | 1.9–2.4                      | Connell <i>et al.</i> , 2016          |
|                          | PEXc (electron beam cross-linked) |              | 0.54      | 1.0                          | Wen <i>et al.</i> , 2015              |
|                          |                                   |              | 0.47      | 1.0                          | Mao <i>et al.</i> , 2016              |
|                          |                                   |              | 0.52      | 1.0                          | Proctor <i>et al.</i> , 2016          |
|                          |                                   |              | 0.95      | 0.08                         | van der Kooij <i>et al.</i> , 1982    |
| Polyvinyl chloride (PVC) | plasticized                       | Shower hose, | 50.97     | 2.0                          | Bucheli-Witschel <i>et al.</i> , 2012 |
|                          |                                   | tubing       | 34.56     | 1.0                          | Wen <i>et al.</i> , 2015              |
|                          |                                   |              | 3.81–4.81 | 1.0                          | Proctor <i>et al.</i> , 2016          |
|                          | unplasticized                     | Pipe,        | 0.23      | 0.08                         | van der Kooij <i>et al.</i> , 1982    |
| housing                  |                                   | 0.03         | 1.9–2.4   | Connell <i>et al.</i> , 2016 |                                       |
|                          |                                   |              | 0.10–0.34 | 1.0                          | Park <i>et al.</i> , 2019             |
| Silicone                 |                                   | Shower hose, | 0.42      | 0.07                         | van der Kooij <i>et al.</i> , 1982    |
|                          |                                   | tubing,      | 0.15      | 2.0                          | Bucheli-Witschel <i>et al.</i> , 2012 |
|                          |                                   | membranes    | 0.47      | 1.0                          | Proctor <i>et al.</i> , 2016          |

---

0.46–1.22

1.0

Park *et al.*, 2019

---

17

18 **References**

19 Reference lists can be found in the manuscript.

20

21
